# Supplementary material
Source: ML conference proceedings conference paper supplement (https://www.ecva.net/papers/eccv_2020/papers_ECCV/html/123490647_ECCV_2020_paper.php)
Supplement: Supplementary file 2 [file 123490647-supp.zip]

# Supplementary Material for Dense Hybrid Recurrent Multi-view Stereo Net with Dynamic Consistency Checking

Jianfeng Yan<sup>1\*</sup>, Zizhuang Wei<sup>1\*</sup>, Hongwei Yi<sup>1\*†</sup>, Mingyu Ding<sup>2</sup>, Runze  
Zhang<sup>3</sup>, Yisong Chen<sup>1</sup>, Guoping Wang<sup>1</sup>, and Yu-Wing Tai<sup>4</sup>

<sup>1</sup> Peking University

{haibao637, weizizhuang, hongweiyi, chenysisong, wgp}@pku.edu.cn

<sup>2</sup> HKU myding@cs.hku.hk

<sup>3</sup> Tencent ryanrzzhang@tencent.com

<sup>4</sup> Kwai Inc. yuwing@gmail.com

## 1 More Reconstruction Results

More reconstruction results on *DTU* [1] *evaluation* dataset, *Tanks and Temples* [20] and *BlendedMVS* [38] are presented in Fig. 1, Fig. 2 and Fig. 3 respectively.

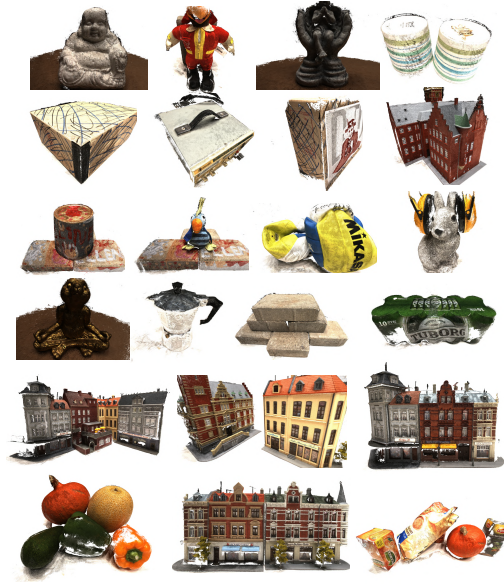

**Fig. 1.** Reconstruction results on DTU [1] evaluation set.

---

\* Equal Contribution.

† Corresponding Author

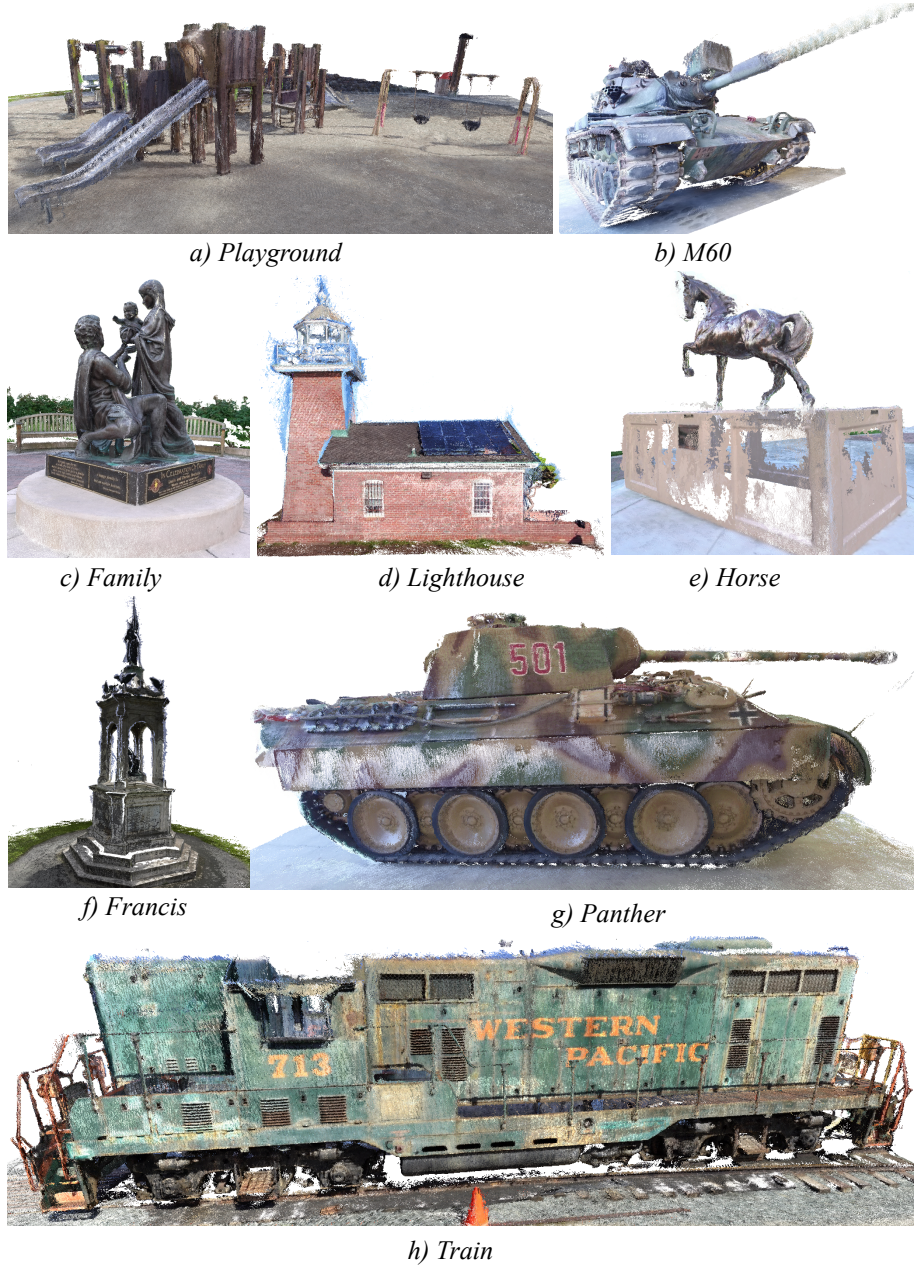

**Fig. 2.** Point cloud reconstruction results on *Tanks and Temples* [20] benchmark. Our method can generate denser, more accurate, delicate and complete point cloud than all presented other methods.



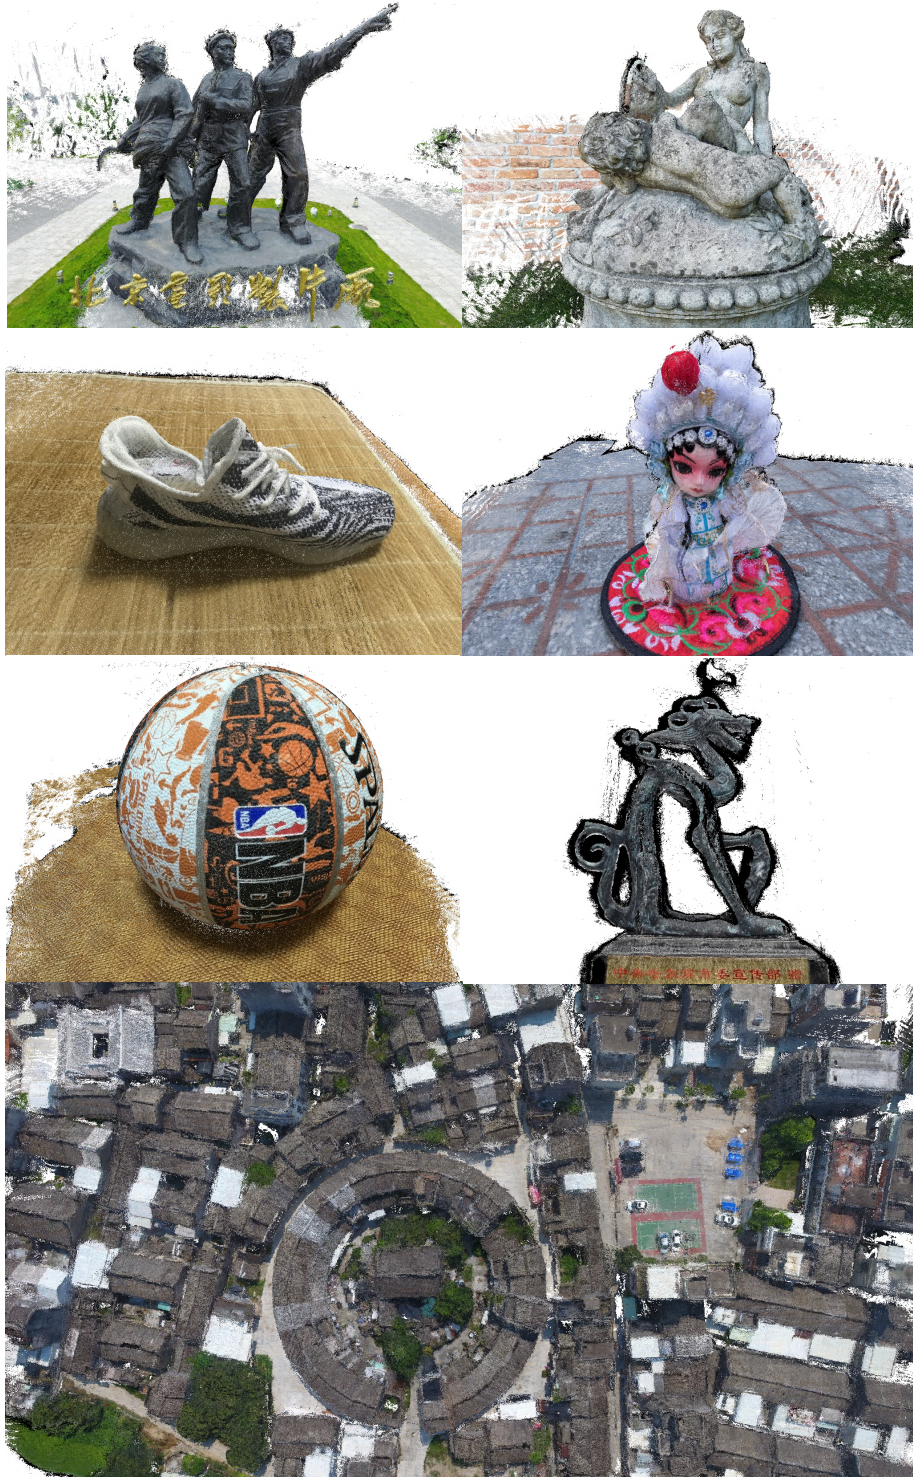

**Fig.3.** Point cloud reconstruction results on *BlendedMVS* [38] benchmark. Our method presents strong generalization on different scale objects especially on large-scale scenes **without any finetuning**.
